# Supplementary material for: Nutritional and Inflammatory Measures Predict Survival of Patients with Stage IV Colorectal Cancer
Source: Research Square preprint supplement (doi:10.21203/rs.3.rs-39821/v3), 2020-10-14
Supplement: Supplementary file 1 [file aa4c852c1c99b3d592676208.xlsx]

## Sheet: Table1
TABLE 1. Relationships between clinicopathological characteristics and CONUT score, PNI, and mGPS.
			CONUT score							PNI					mGPS
	All cases		Low (0/1)		Intermediate (2/3)		High (≥4)		P value	Low (<48.0)		High (≥48.0)		P value	0		1		2		P value
Cases	996		614 (61%)		276 (28%)		106 (11%)			443 (44%)		553 (56%)			633 (64%)		234 (23%)		129 (13%)
Age (years)		61.0 (20-91)
<65	625 (63%)		399 (65%)		170 (62%)		56 (53%)		0.052	249 (56%)		376 (68%)		<0.001	392 (62%)		160 (68%)		73 (57%)		0.066
≥65	371 (37%)	61.0 (20-91)	215 (35%)		106 (38%)		50 (47%)			194 (44%)		177 (32%)			241 (38%)		74 (32%)		56 (43%)
Gender
Male	573 (58%)	573 (58%)	340 (55%)		167 (61%)		66 (62%)		0.208	239 (54%)		334 (60%)		0.041	277 (44%)		93 (40%)		53 (41%)		0.537
Female	423 (42%)	423 (42%)	274 (45%)		109 (39%)		40 (38%)			204 (46%)		219 (40%)			356 (56%)		141 (60%)		76 (59%)
BMI
<20 kg/m2	264 (27%)		131 (21%)		89 (32%)		44 (42%)		<0.001	152 (34%)		112 (20%)		<0.001	162 (26%)		51 (22%)		51 (40%)		<0.001
≥20 kg/m2	732 (73%)		483 (79%)		187 (68%)		62 (58%)			291 (66%)		441 (80%)			471 (74%)		183 (78%)		78 (60%)
ECOG performance status
PS0, PS1	961 (96%)	961 (96%)	600 (98%)		267 (97%)		94 (89%)		<0.001	418 (94%)		543 (98%)		0.001	623 (98%)		223 (95%)		115 (89%)		<0.001
PS2, PS3, PS4	35 (4%)	35 (4%)	14 (2%)		9 (3%)		12 (11%)			25 (6%)		10 (2%)			10 (2%)		11 (5%)		14 (11%)
Location of primary tumor
Right-sided	293 (29%)	293 (29%)	158 (26%)		95 (34%)		40 (38%)		0.004	163 (37%)		130 (24%)		<0.001	169 (27%)		77 (33%)		47 (36%)		0.035
Left-sided	703 (71%)	703 (71%)	456 (74%)		181 (66%)		66 (62%)			280 (63%)		423 (76%)			464 (73%)		157 (67%)		82 (64%)
CEA
<30 ng/ml	524 (53%)	524 (53%)	351 (57%)		133 (48%)		40 (38%)		<0.001	186 (42%)		338 (61%)		<0.001	404 (64%)		86 (37%)		34 (26%)		<0.001
≥30 ng/ml	472 (47%)	472 (47%)	263 (43%)		143 (52%)		66 (62%)			257 (58%)		215 (39%)			229 (36%)		148 (63%)		95 (74%)
Histological type
Differentiated	897 (90%)	897 (90%)	553 (90%)		249 (90%)		95 (90%)		0.985	396 (89%)		501 (91%)		0.527	576 (91%)		205 (88%)		116 (90%)		0.334
Others	99 (10%)	99 (10%)	61 (10%)		27 (10%)		11 (10%)			47 (11%)		52 (9%)			57 (9%)		29 (12%)		13 (10%)
M category
M1a	553 (56%)	553 (56%)	355 (58%)		145 (53%)		53 (50%)		0.268	230 (52%)		323 (58%)		0.080	388 (61%)		106 (45%)		59 (46%)		<0.001
M1b	227 (23%)	227 (23%)	132 (21%)		64 (23%)		31 (29%)			114 (26%)		113 (20%)			119 (19%)		64 (27%)		44 (34%)
M1c	216 (22%)	216 (22%)	127 (21%)		67 (24%)		22 (21%)			99 (22%)		117 (21%)			126 (20%)		64 (27%)		26 (20%)
Surgical treatment
Curative resection	302 (30%)		208 (34%)		74 (27%)		20 (19%)		<0.001	101 (23%)		201 (36%)		<0.001	257 (40%)		33 (14%)		12 (9%)		<0.001
Palliative resection of primary tumor	303 (30%)	694 (70%)	208 (34%)	406 (66%)	74 (27%)	202 (73%)	21 (20%)	86 (81%)		120 (27%)	342 (77%)	183 (33%)	352 (64%)		207 (33%)	376 (60%)	68 (29%)	201 (86%)	28 (22%)	117 (91%)
No resection	391 (40%)		198 (32%)		128 (46%)		65 (61%)			222 (50%)		169 (31%)			169 (27%)		133 (57%)		89 (69%)
Albumin (g/dl)	4.0 (3.7-4.3)		4.1 (3.9-4.4)		3.9 (3.5-4.2)		3.1 (2.8-3.4)		<0001	3.7 (3.3-3.9)		4.3 (4.1-4.4)		<0.001	4.2 (4.0-4.4)		3.8 (3.7-4.0)		3.2 (2.9-3.3)		<0.001
CRP (mg/dl)	0.5 (0.1-2.0)		0.3 (0.1-1.1)		0.8 (0.2-2.7)		4.3 (1.2-8.2)		<0001	1.5 (0.4-4.6)		0.2 (0.1-0.7)		<0.001	0.2 (0.1-0.4)		2.3 (1.4-4.1)		5.8 (2.6-8.4)		<0.001
Total cholesterol (mg/dl)	203 (173-240)		210 (186-243)		193 (165-235)		162 (136-221)		<0001	196 (164-239)		208 (182-240)		<0.001	203 (176-233)		201 (172-257)		205 (157-256)		0.574
Lymphocytes (mm3)	1600 (1200-2000)		1800 (1520-2200)		1125 (1000-1500)		1105 (900-1508)		<0001	1300 (1070-1600)		1870 (1500-2270)		<0.001	1640 (1300-2000)		1600 (1200-2100)		1320 (1070-1700)		<0.001
CONUT: controlling nutritional status, PNI: prognostic nutritional index, mGPS: modified Glasgow prognostic score BMI: body mass index, ECOG PS: Eastern Cooperative Oncology Group performance status, CEA: carcinoembryonic antigen Numerical data are expressed as median (25-75% interquartile range).
